# Supplementary material
Source: publisher figshare collection journal article supplement (https://gsajournals.figshare.com/ndownloader/files/15023057)
Supplement: Supplementary file 1 [file 15023057]

**Figure S1** Distribution of GRAF-pop scores of subjects with different study-reported, continental populations across all dbGaP studies. Panels on the left (A, C, E, G, I) show scatter plots of GD2 vs GD1. Panels on the right (B, D, F, H, J) show plots of GD4 vs. GD1. Panels from top to bottom show different study-reported (aggregated to continental level) populations. (A, B) European. (C, D) African (including African American). (E, F): Asian. (G, H) South Asian. (I, J): Hispanic.
